# Supplementary material for: Fos regulates macrophage infiltration against surrounding tissue resistance by a cortical actin-based mechanism in Drosophila
Source: PubMed Central journal article supplement (PMC8735623; doi:10.1371/journal.pbio.3001494), 2022-01-06
Supplement: pbio.3001494.s003.pdf [file pbio.3001494.s003.pdf]

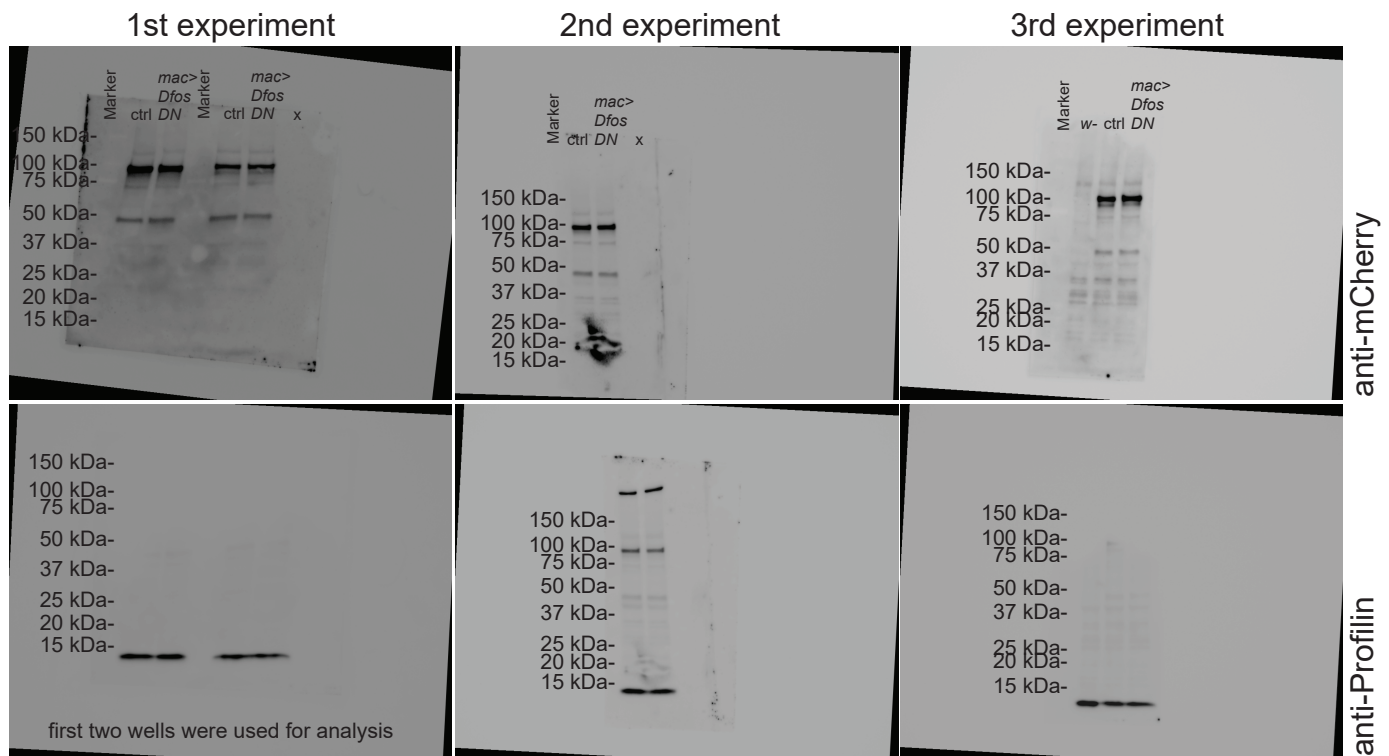

Chemiluminescence was recorded with a ChemieDoc MP (BioRad) molecular imager and the bands were densitometrically analyzed with ImageJ.

These blots are the source for the data shown in S4A-A'.
